# Supplementary material for: Glioma-targeted multifunctional nanoparticles to co-deliver camptothecin and curcumin for enhanced chemo-immunotherapy
Source: Royal Society of Chemistry journal article supplement (doi:10.1039/d1bm01987b), 2022-01-01
Supplement: d1bm01987b1.pdf [file d1bm01987b1.pdf]

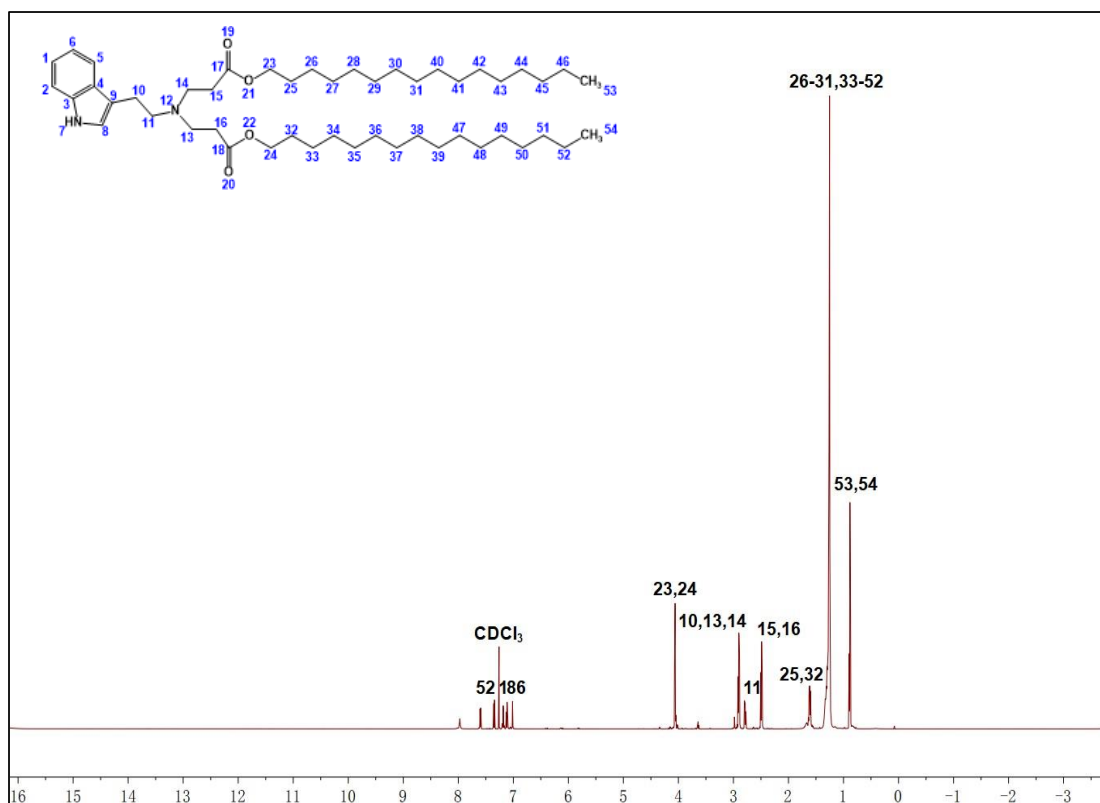

Figure S1: <sup>1</sup>H NMR of NTs

<sup>1</sup>H NMR (600 MHz, Chloroform-d)  $\delta$  7.60 (d,  $J = 8.0$  Hz, 1H), 7.35 (d,  $J = 8.1$  Hz, 1H), 7.18 (s, 1H), 7.11 (s, 1H), 7.01 (d,  $J = 2.2$  Hz, 1H), 4.06 (t,  $J = 6.8$  Hz, 4H), 2.90 (t,  $J = 7.2$  Hz, 6H), 2.82 – 2.76 (m, 2H), 2.49 (t,  $J = 7.3$  Hz, 4H), 1.64 – 1.57 (m, 5H), 1.25 (s, 52H), 0.88 (t,  $J = 7.0$  Hz, 7H).

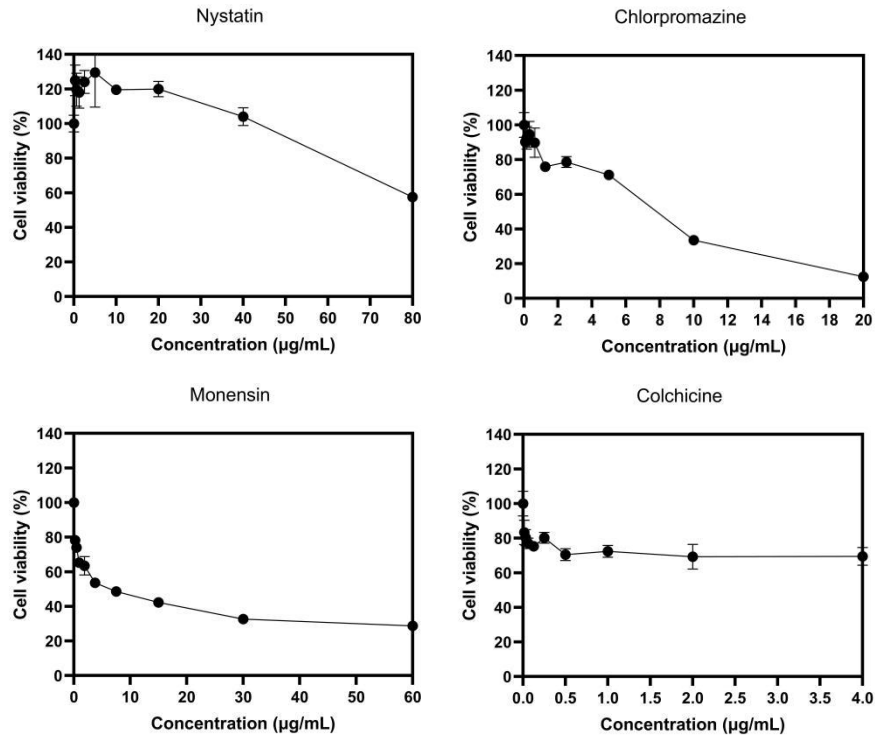

Figure S2. Cell viability of cellular uptake inhibitors.

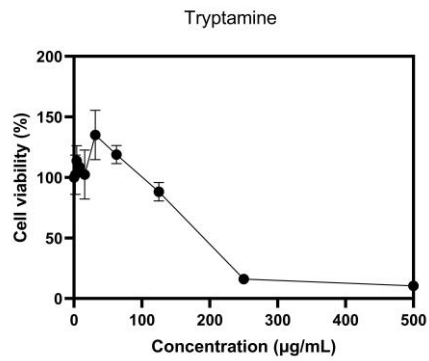

Figure S3. Cell viability of tryptamine.
